# Supplementary material for: BCL-XL and MCL-1 are the key BCL-2 family proteins in melanoma cell survival
Source: PubMed Central journal article supplement (PMC6482196; doi:10.1038/s41419-019-1568-3), 2019-04-24

## SUPPLEMENTARY FIGURES

### SUPPLEMENTARY FIGURE LEGENDS

#### Supplementary Table 1

Cell lines used in this study and their BRAF /NRAS mutation status.

#### Supplementary Table 2

Summary of the EC<sub>50</sub> values obtained from BH3-mimetic drug treatments used in this study (corresponding to data in Fig. 2 and Supplementary Fig. S1). Values were determined from CellTiter-Glo viability assays and represent the mean of n = 3-9 separate assays.

**Supplementary Figure 1.** Melanoma cells are insensitive to BH3-mimetic drugs as single agents. Extension of data presented in Figure 2 in main text. Selective antagonism of BCL-XL (A1331852), BCL-2 (ABT-199) or MCL-1 (S63845), as well as co-targeting of BCL-XL, BCL-2 and BCL-W (ABT-263) fails to kill the majority of melanoma cell lines unless high concentrations are used. Data represent mean ± standard deviation from n = 3 separate assays.

**Supplementary Figure 2.** Co-antagonism of several pro-survival BCL-2 proteins has greater effect on cell viability than targeting each protein alone. Extension of data presented in Fig. S3a. Antagonism of MCL-1 plus BCL-XL (S63845 + either A1331852 or ABT-263) is more effective than the combination targeting MCL-1 plus BCL-2 (S63845 + ABT-199) in all melanoma cell lines tested. Cell viability was determined after 24 h treatment by CellTiter-Glo luminescent assay. Data represent mean ± standard deviation from n = 3-4 separate assays.

**Supplementary Figure 3.** Drug combinations targeting MCL-1 plus BCL-XL or BCL-2 act synergistically. Synergy analysis was performed for BH3-mimetic combinations on a established and

**b** patient-derived cell lines using Combenefit software (36). Data presented were produced using the Bliss model, however, nearly identical outcomes were produced using the Loewe and Highest Single Agent models.

**Supplementary Figure 4.** Treatment with BH3-mimetic drugs for 72 h has causes only a minor increase in melanoma cell killing compared to 24 h treatment. **a** Cells were treated with S63845, ABT-263 and various combinations for 72 h before analysis by CellTiter-Glo viability assay. **b** EC<sub>50</sub> values for drug combinations at 24 (from Supplementary Table 1) and 72 h. Data represent mean ± standard deviation from n = 3 separate assays.

**Supplementary Figure 5:** BH3-mimetics combinations are synergistic in 3D cultures. A02 cells were allowed to form spheroids over 72 h, then spheroids embedded in collagen matrix and treated for 72 h with drugs or combinations as indicated. Bright field images (left panel) and fluorescence images for DRAQ7 staining (right panel) are shown for each combination. The panel in the top right (red box) represents the vehicle only control. Spheroids were imaged with an Olympus FV3000 Laser Scanning Confocal Microscope/Olympus UPLSAPO 4×. Note differences in DRAQ7 intensity and distribution. Data are representative of N = 2 independent experiments with three spheroids per condition.

**Supplementary Figure 6.** BAX and BAK deletion reduce sensitivity of melanoma cell lines to BH3-mimetic drug combinations. **a** Doxycycline-induced expression of sgRNAs targeting *BAK* or *BAX* in Cas9-expressing LM-MEL-28 melanoma cells results in a significant reduction in BAK or BAX protein levels, respectively, as determined by Western blotting. Probing for β-actin was used as a loading control. **b** Although deficiency (dotted lines) in BAK (left panel) or BAX (right panel) did not significantly impact sensitivity to single-agent treatment with BH3-mimetic drugs (S63845, ABT-

263, ABT-199, A1331852), cells lacking BAK or BAX were more resistant to combination BH3-mimetic drug treatments than wild-type cells.

**Supplementary Figure 7.** Deletion of BFL-1 together with antagonism of other pro-survival BCL-2 family members has only minor impact on melanoma cell survival. **a** CRISPR/Cas9-mediated deletion BFL-1 in M14 and LM-MEL-28 melanoma cell lines confirmed by Western blot analysis. **b** EC<sub>50</sub> values for BH3-mimetic combinations in each BFL-1-deleted (*BCL2A1* sgRNA) and control (*BCL2A1* wt) cell line. Data represent mean ± standard deviation from n = 3 separate assays.

**Supplementary Figure 8.** Treatment of melanoma cell lines with bortezomib induces NOXA protein expression at concentrations where enhanced cell killing effects with S63845 were also observed, as determined by Western blotting. Probing for β-actin was used as a loading control.

|                       | BRAF  | NRAS |
|-----------------------|-------|------|
| Established lines     |       |      |
| CHL-1                 | WT    | WT   |
| MeWo                  | WT    | WT   |
| A375                  | V600E | WT   |
| A02                   | V600E | WT   |
| M14                   | V600E | WT   |
| UACC 257              | V600E | WT   |
| SK-MEL-5              | V600E | WT   |
| Patient-derived lines |       |      |
| LM-MEL-28             | V600E | WT   |
| LM-MEL-33             | V600E | WT   |
| LM-MEL-34             | WT    | Q61Q |
| LM-MEL-53             | WT    | WT   |

Supplementary Table 2

| Cell line | EC <sub>50</sub> values (nM) |                  |             |              |                  |           |             |                   |          |           |             |              |       |
|-----------|------------------------------|------------------|-------------|--------------|------------------|-----------|-------------|-------------------|----------|-----------|-------------|--------------|-------|
|           | S63845                       | S63845 + ABT-263 |             |              | S63845 + ABT-199 |           |             | S63845 + A1331852 |          |           |             |              |       |
|           | ABT-263                      | 5 $\mu$ M        | 0.5 $\mu$ M | 0.05 $\mu$ M | ABT-199          | 5 $\mu$ M | 0.5 $\mu$ M | 0.05 $\mu$ M      | A1331852 | 5 $\mu$ M | 0.5 $\mu$ M | 0.05 $\mu$ M |       |
| CHL-1     | 9 490                        | 6 760            | 1.66        | 13.6         | 208              | 5 840     | 30.4        | 347               | 604      | 14 100    | 2.96        | 38.6         | 174   |
| MeWo      | 6 820                        | 12 000           | 16.6        | 115          | 438              | 5 560     | 61.7        | 518               | 676      | 21 400    | 30.3        | 191          | 373   |
| A375      | 13 200                       | 8 910            | 5.88        | 55.7         | 1 230            | 17 400    | 364         | 7 080             | 11 500   | 10 500    | 15.4        | 35.2         | 411   |
| A02       | 8 350                        | 11 000           | 4.32        | 34.9         | 279              | 16 200    | 16.2        | 552               | 1 840    | 20 000    | 17.6        | 187          | 555   |
| M14       | 13 100                       | 10 470           | 89.0        | 1 460        | 4 240            | 14 800    | 1 230       | 5 890             | 11 500   | 23 400    | 631         | 1 820        | 3 470 |
| UACC 257  | 4 300                        | 21 900           | 4.81        | 35.3         | 121              | 22 400    | 14.8        | 253               | 1 700    | 26 900    | 3.48        | 22.7         | 130   |
| SK-MEL-5  | 13 200                       | 12 300           | 1.79        | 204          | 4 680            | 10 700    | 186         | 9 550             | 11 200   | 16 600    | 20.6        | 127          | 2 890 |
| LM-MEL-28 | 7 480                        | 5 750            | 8.24        | 60.5         | 434              | 12 000    | 42.8        | 1 540             | 4 220    | 15 100    | 22.1        | 100          | 613   |
| LM-MEL-33 | 8 180                        | 12 900           | 6.26        | 67.4         | 821              | 15 100    | 219         | 2 740             | 7 530    | 13 800    | 8.48        | 37.7         | 365   |
| LM-MEL-34 | 1 340                        | 3 550            | 0.472       | 3.61         | 15.1             | 11 200    | 1.40        | 44.3              | 159      | 7 410     | 1.50        | 4.67         | 14.7  |
| LM-MEL-53 | 9 150                        | 5 890            | 1.22        | 1.82         | 53.5             | 12 900    | 10.4        | 2 480             | 11 200   | 1 000     | 1.47        | 1.61         | 1.75  |

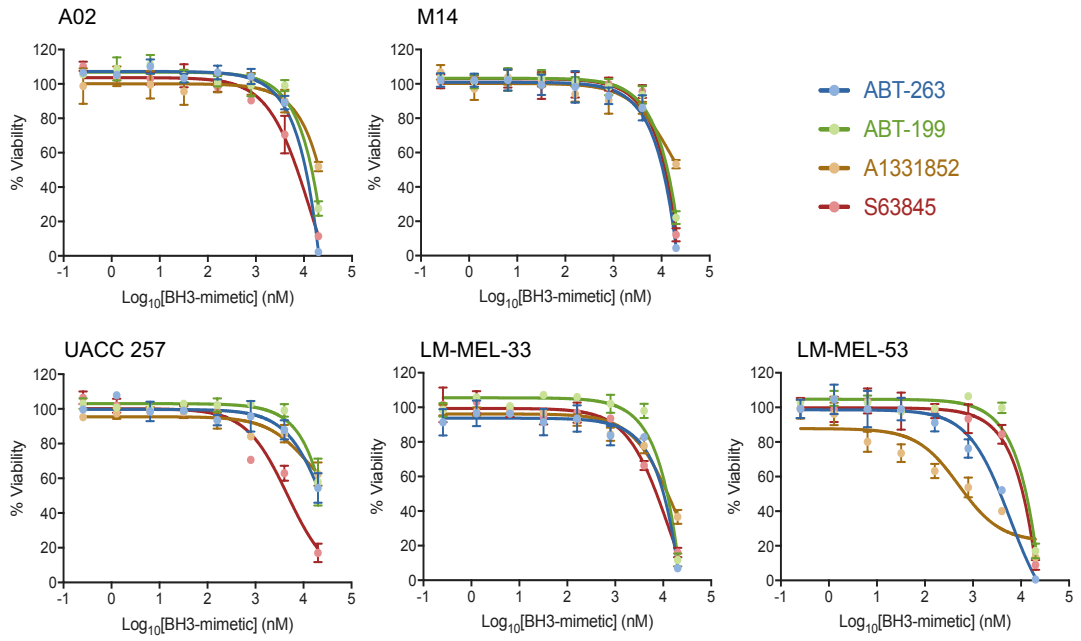

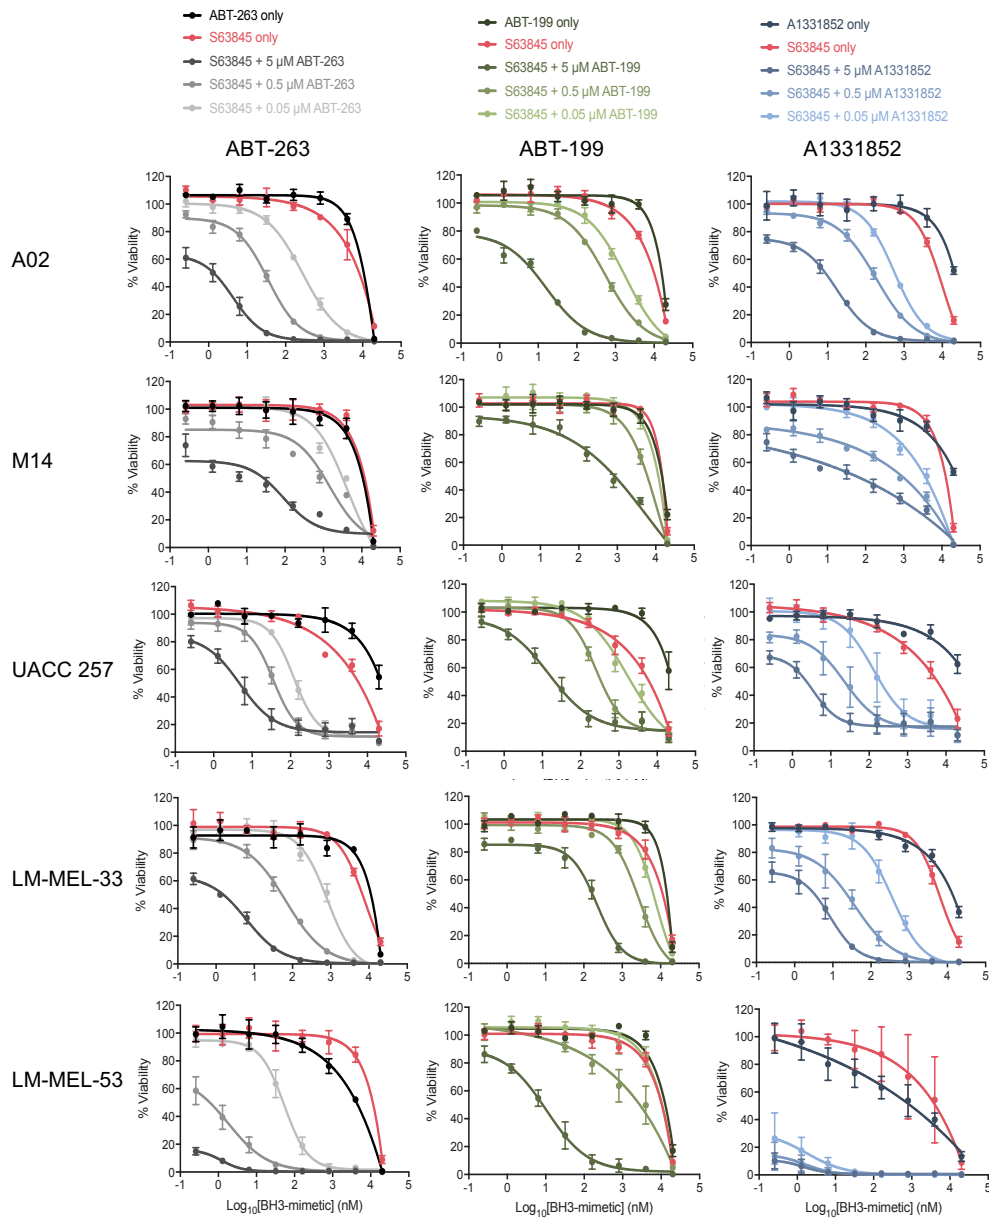

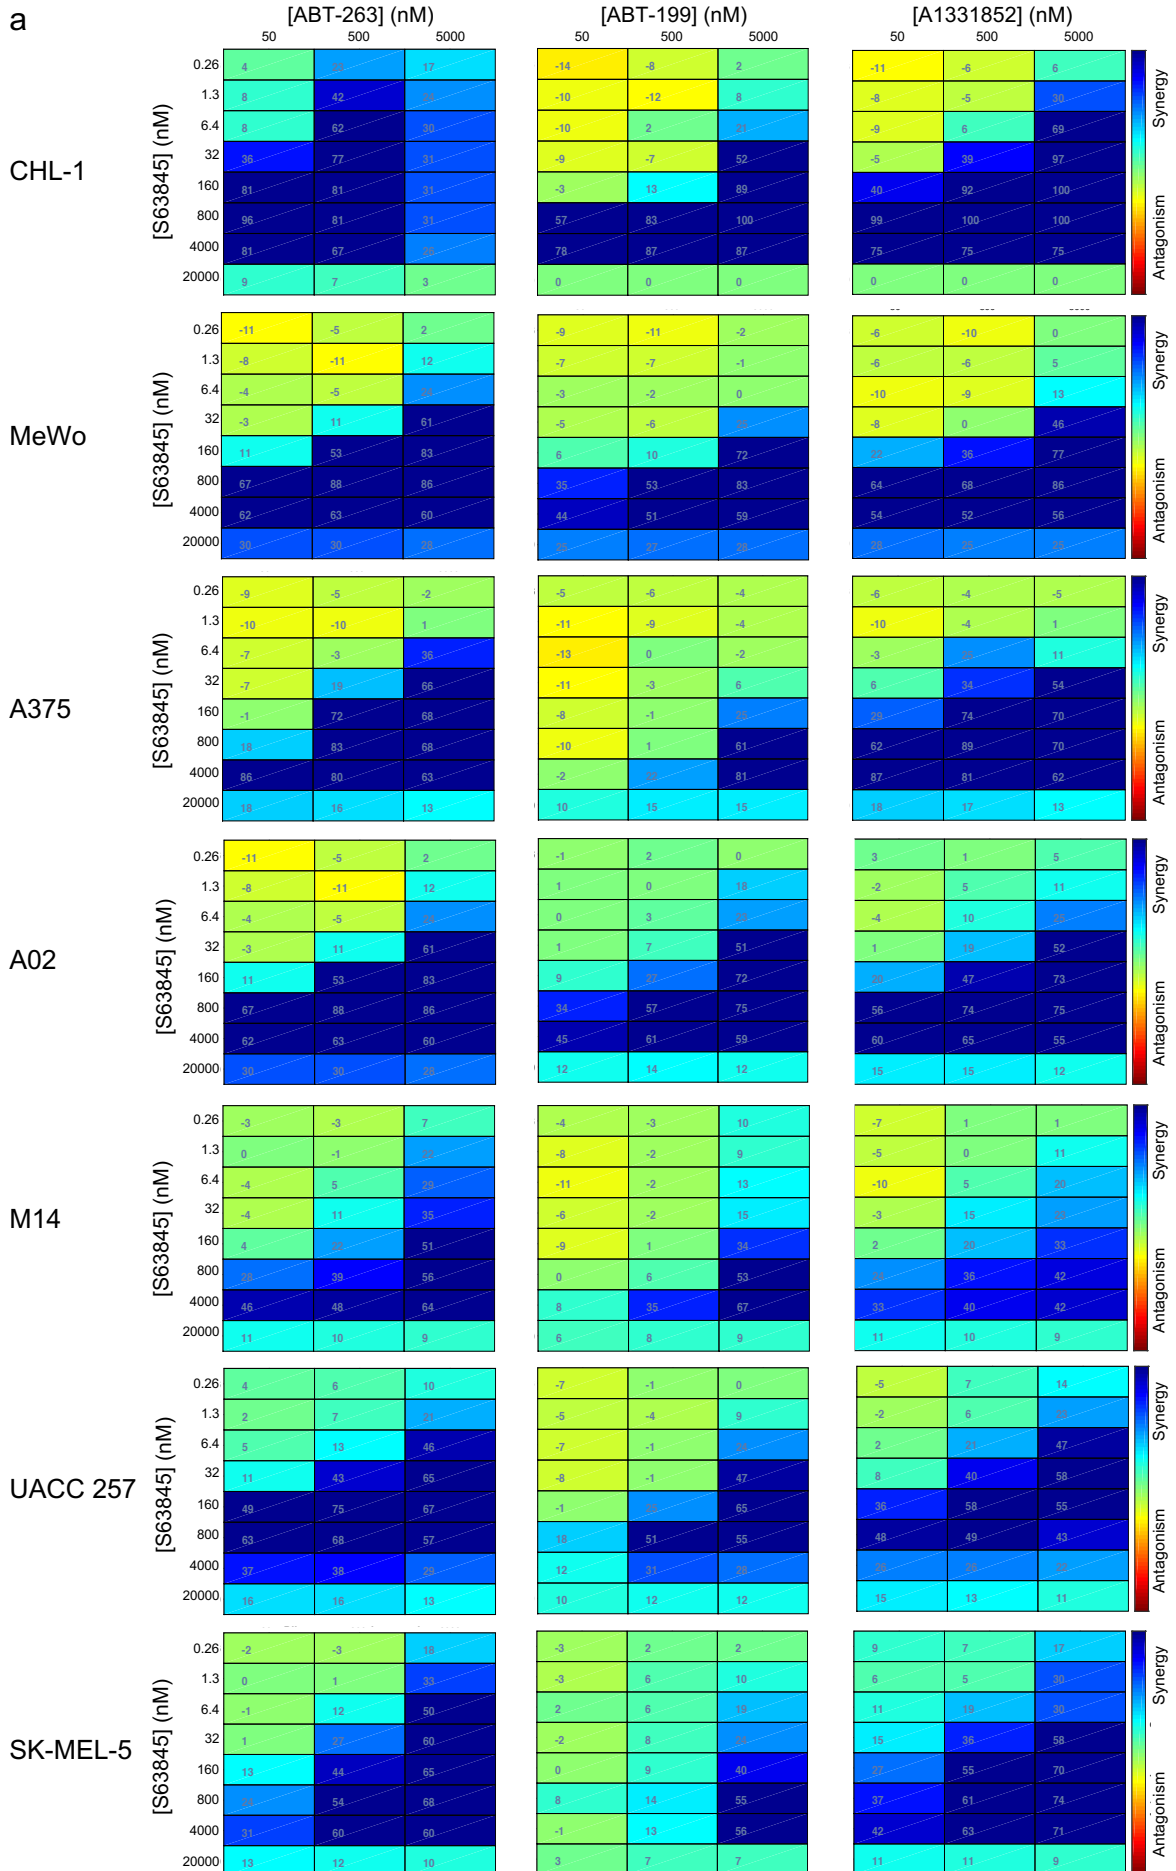



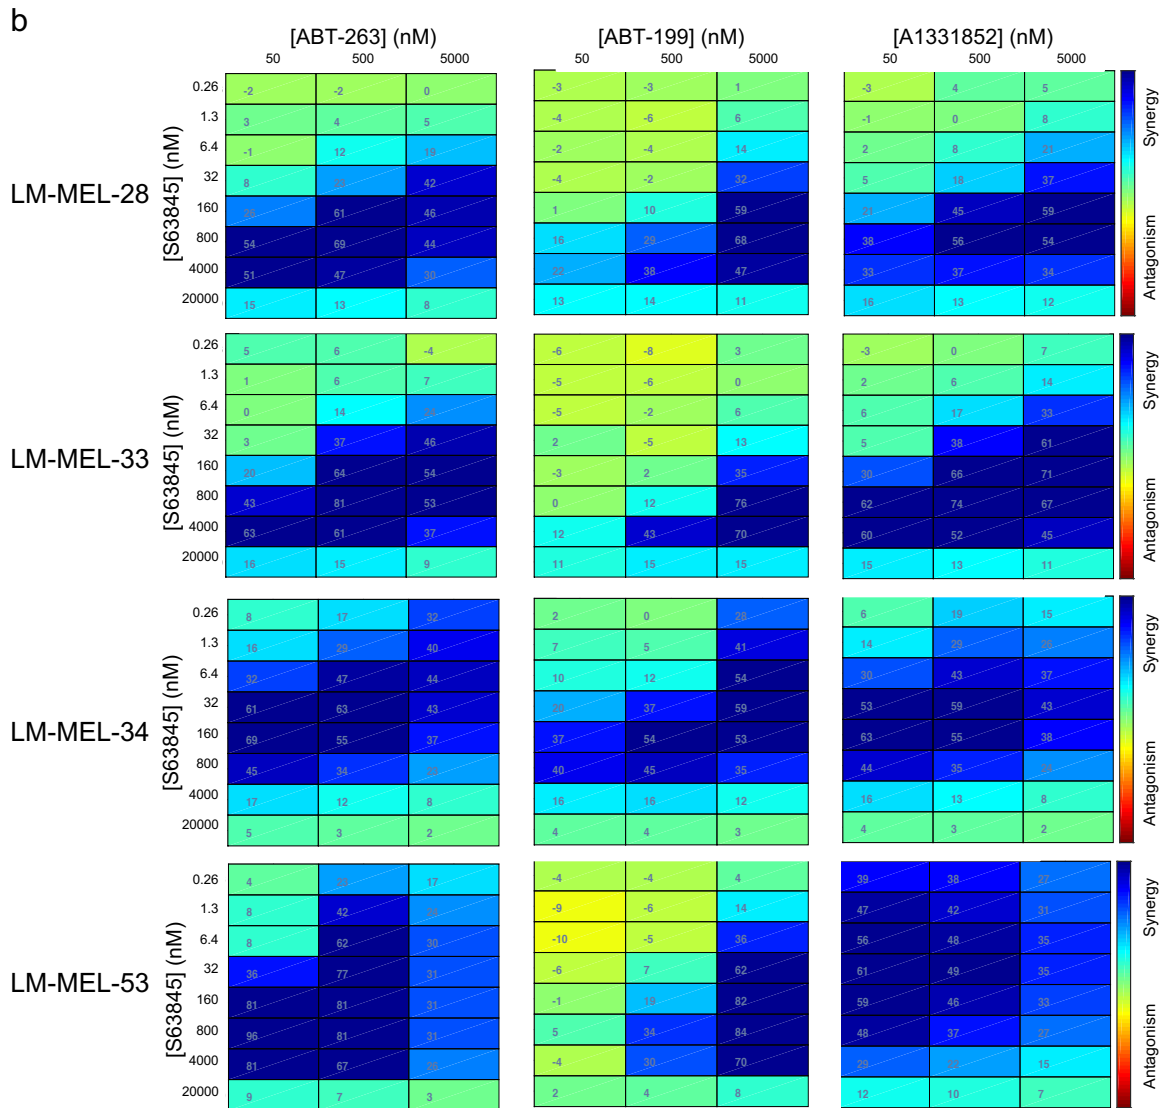

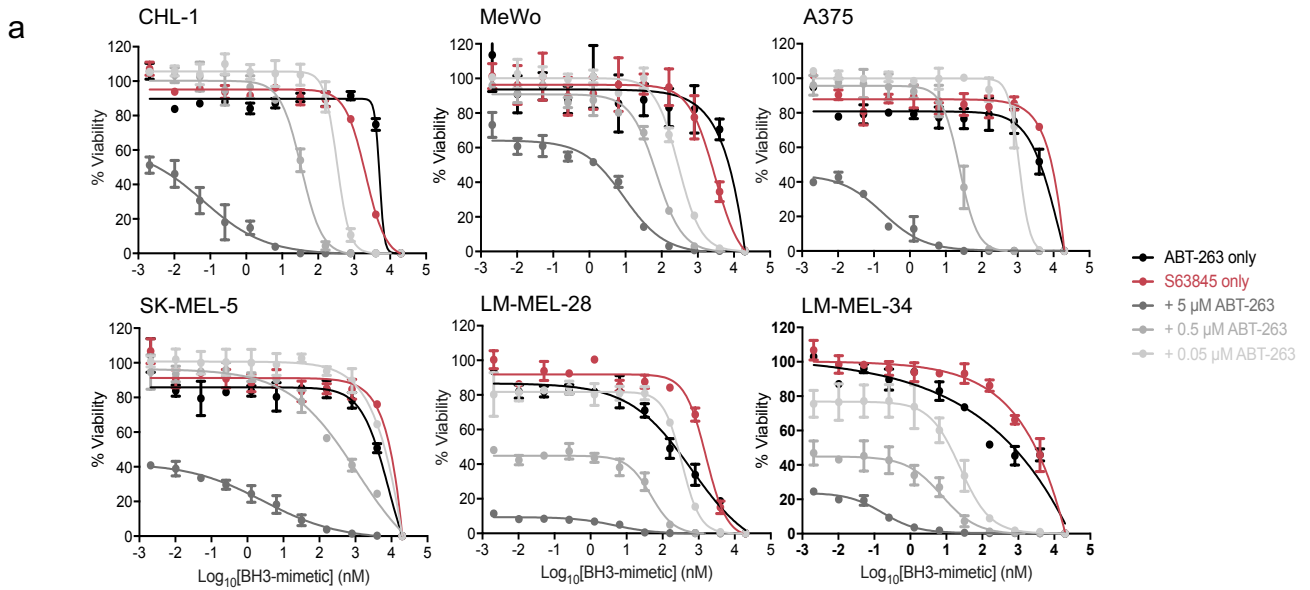**b**

|           | EC <sub>50</sub> values (nM) |        |         |       |                   |        |                     |       |                      |       |
|-----------|------------------------------|--------|---------|-------|-------------------|--------|---------------------|-------|----------------------|-------|
|           | S63845                       |        | -       |       | S63845 + ABT-263  |        |                     |       |                      |       |
|           | -                            |        | ABT-263 |       | 5 $\mu$ M ABT-263 |        | 0.5 $\mu$ M ABT-263 |       | 0.05 $\mu$ M ABT-263 |       |
|           | 24 h                         | 72 h   | 24 h    | 72 h  | 24 h              | 72 h   | 24 h                | 72 h  | 24 h                 | 72 h  |
| CHL-1     | 9 490                        | 2 080  | 6 760   | 5 080 | 1.66              | 0.0638 | 13.6                | 34.0  | 208                  | 333   |
| MeWo      | 6 820                        | 2 970  | 12 000  | 8 320 | 16.6              | 9.02   | 115                 | 71.6  | 438                  | 286   |
| A375      | 13 200                       | 11 000 | 8 910   | 6 610 | 5.88              | 0.175  | 55.7                | 24.4  | 1 230                | 1 110 |
| SK-MEL-5  | 13 200                       | 11 200 | 12 300  | 8 590 | 1.79              | 2.82   | 204                 | 1 120 | 4 680                | 6 610 |
| LM-MEL-28 | 7 480                        | 1 590  | 5 750   | 648   | 8.24              | 4.77   | 60.5                | 46.8  | 434                  | 342   |
| LM-MEL-34 | 1 340                        | 3 240  | 3 550   | 776   | 0.472             | 0.172  | 3.61                | 7.46  | 15.1                 | 24.1  |

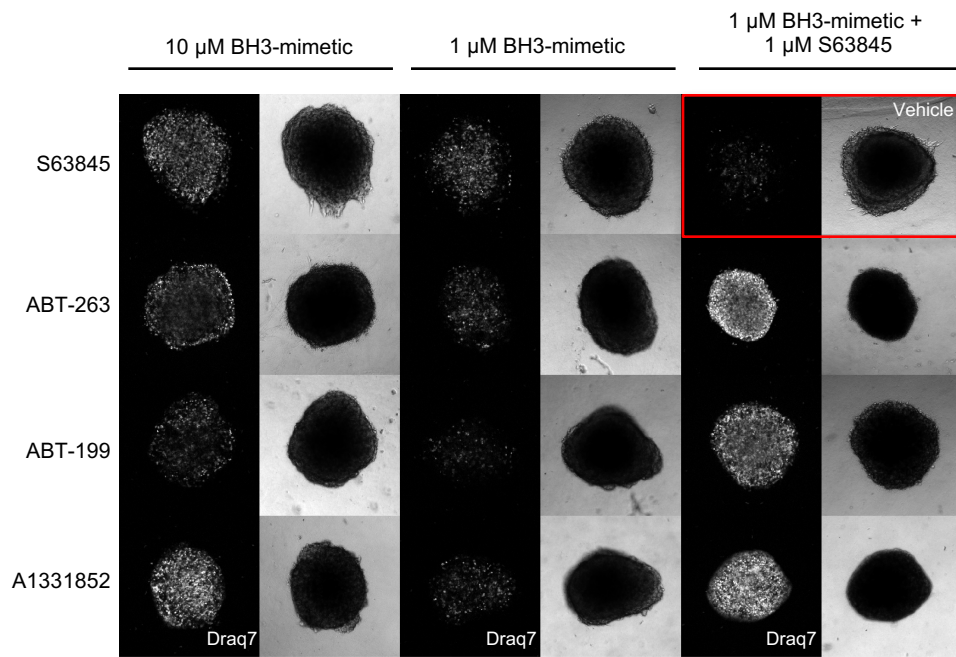

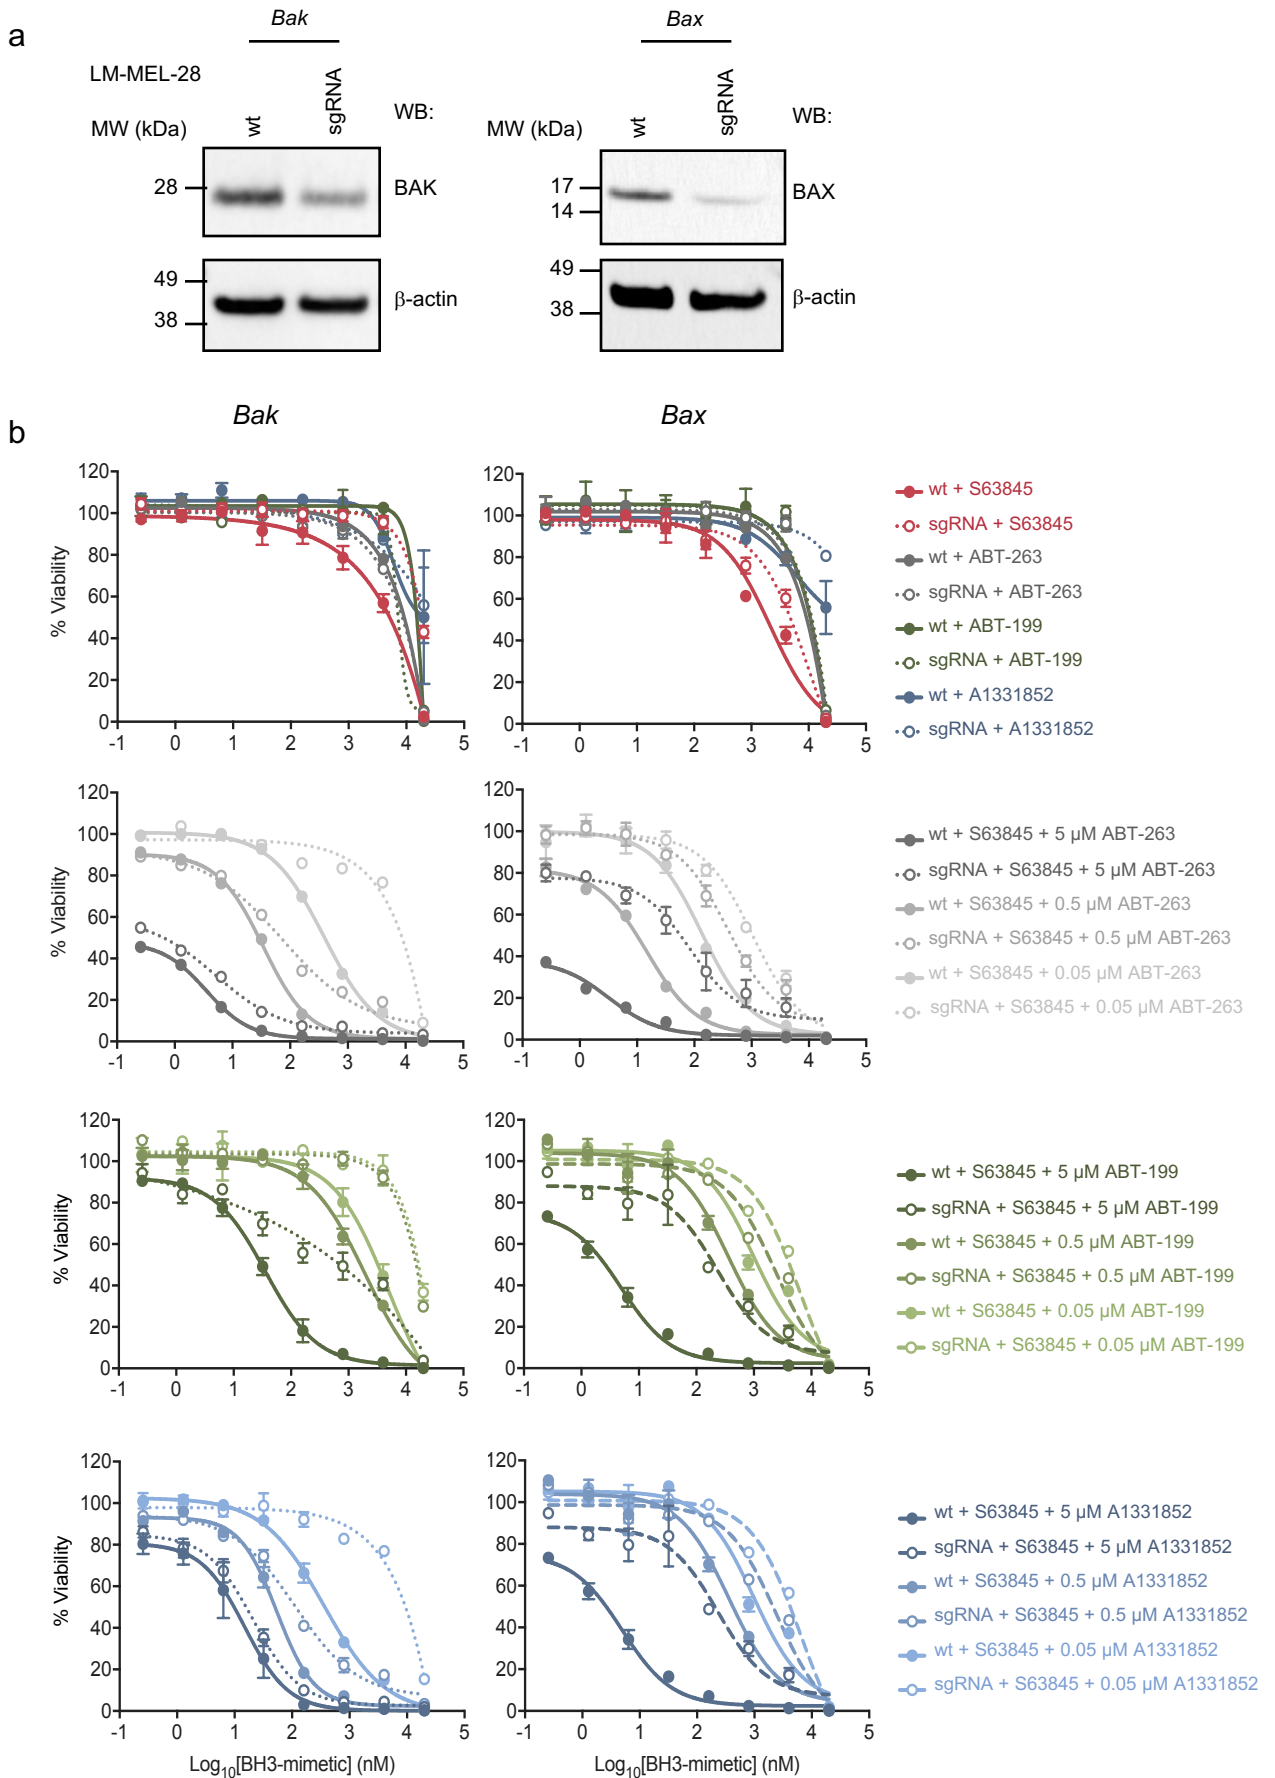

a

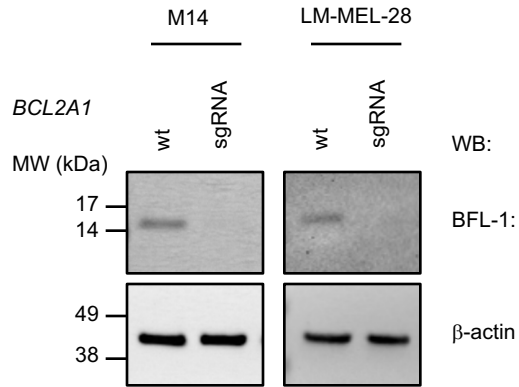

b

| Cell line:               |                  | EC <sub>50</sub> values (nM) |                     |                  |                     |
|--------------------------|------------------|------------------------------|---------------------|------------------|---------------------|
|                          |                  | M14                          |                     | LM-MEL-28        |                     |
|                          |                  | <i>BCL2A1</i> wt             | <i>BCL2A1</i> sgRNA | <i>BCL2A1</i> wt | <i>BCL2A1</i> sgRNA |
| S63845                   | -                | 6 550                        | 2 830               | 2 500            | 829                 |
|                          | ABT-263          | 17 000                       | 12 600              | 8 510            | 10 200              |
| S63845 +<br>ABT-263      | 5 μM ABT-263     | 221                          | 33.9                | 17.0             | 9.72                |
|                          | 0.5 μM ABT-263   | 1 580                        | 268                 | 109              | 59.9                |
|                          | 0.05 μM ABT-263  | 2 630                        | 919                 | 508              | 210                 |
|                          | ABT-199          | 7 080                        | 2 450               | 2 830            | 854                 |
| S63845 +<br>ABT-199      | 5 μM ABT-199     | 686                          | 255                 | 83.2             | 54.6                |
|                          | 0.5 μM ABT-199   | 3 350                        | 1 150               | 836              | 350                 |
|                          | 0.05 μM ABT-199  | 5 570                        | 1 830               | 975              | 490                 |
|                          | A1331852         | 20 000                       | 20 000              | 18 600           | 13 200              |
| S63845 +<br>A133185<br>2 | 5 μM A1331852    | 238                          | 63.9                | 53.1             | 32.7                |
|                          | 0.5 μM A1331852  | 1 240                        | 349                 | 188              | 91.5                |
|                          | 0.05 μM A1331852 | 1 540                        | 633                 | 558              | 218                 |

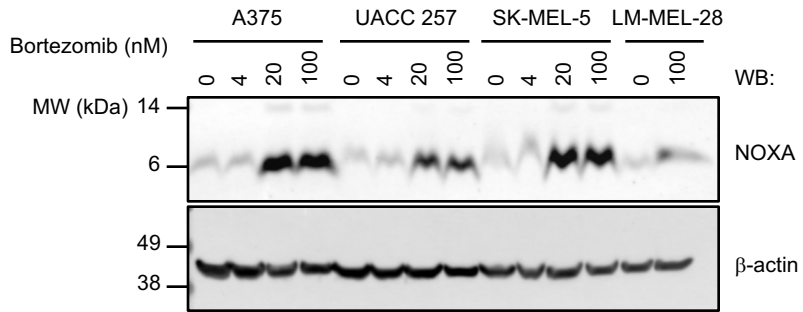

Supplement: 41419_2019_1568_MOESM1_ESM.pdf [file 41419_2019_1568_MOESM1_ESM.pdf]
